# Supplementary material for: Rational bottom-up synthesis of sulphur-rich porous carbons for single-atomic platinum catalyst supports
Source: Royal Society of Chemistry journal article supplement (doi:10.1039/d4gc02055c), 2024-01-01
Supplement: d4gc02055c1.pdf [file d4gc02055c1.pdf]

## Supplementary Information

### **Rational bottom-up synthesis of sulphur-rich porous carbons for single-atomic platinum catalyst supports**

Koki Chida,<sup>a</sup> Takeharu Yoshii,<sup>\*,a</sup> Ryo Kawaguchi,<sup>a</sup> Masataka Inoue,<sup>b</sup> Fumito Tani,<sup>b</sup> Tatsuki Sobue,<sup>c</sup> Shunsuke Ohtani,<sup>c</sup> Kenichi Kato,<sup>c</sup> Tomoki Ogoshi,<sup>\*,c,d</sup> Shoko Nakahata,<sup>e</sup> Kazuhide Kamiya,<sup>\*,e,f</sup> Hiroto Nishihara<sup>a,g</sup>

<sup>a</sup>Institute of Multidisciplinary Research for Advanced Materials, Tohoku University, 2-1-1 Katahira, Aoba-ku, Sendai, Miyagi, 980-8577, Japan.

<sup>b</sup>Institute for Materials Chemistry and Engineering, Kyushu University, 744 Motooka, Nishi-ku, Fukuoka, 819-0395, Japan.

<sup>c</sup>Department of Synthetic Chemistry and Biological Chemistry, Graduate School of Engineering, Kyoto University, Nishikyo-ku, Kyoto, 615-8510, Japan.

<sup>d</sup>WPI Nano Life Science Institute (WPI-NanoLSI), Kanazawa University, Kakuma-machi, Kanazawa, Ishikawa, 920-1192, Japan.

<sup>e</sup>Research Center for Solar Energy Chemistry, Graduate School of Engineering Science, Osaka University, 1-3 Machikaneyama, Toyonaka, Osaka, 560-8531, Japan.

<sup>f</sup>Innovative Catalysis Science Division, Institute for Open and Transdisciplinary Research Initiatives (ICS-OTRI), Osaka University Suita, Osaka, 565-0871, Japan.

<sup>g</sup>Advanced Institute for Materials Research (WPI-AIMR), Tohoku University, 2-1-1 Katahira, Aoba-ku, Sendai, Miyagi, 980-8577, Japan.

\*Corresponding authors: takeharu.yoshii.b3@tohoku.ac.jp; ogoshi@sbchem.kyoto-u.ac.jp; kamiya.kazuhide.es@osaka-u.ac.jp

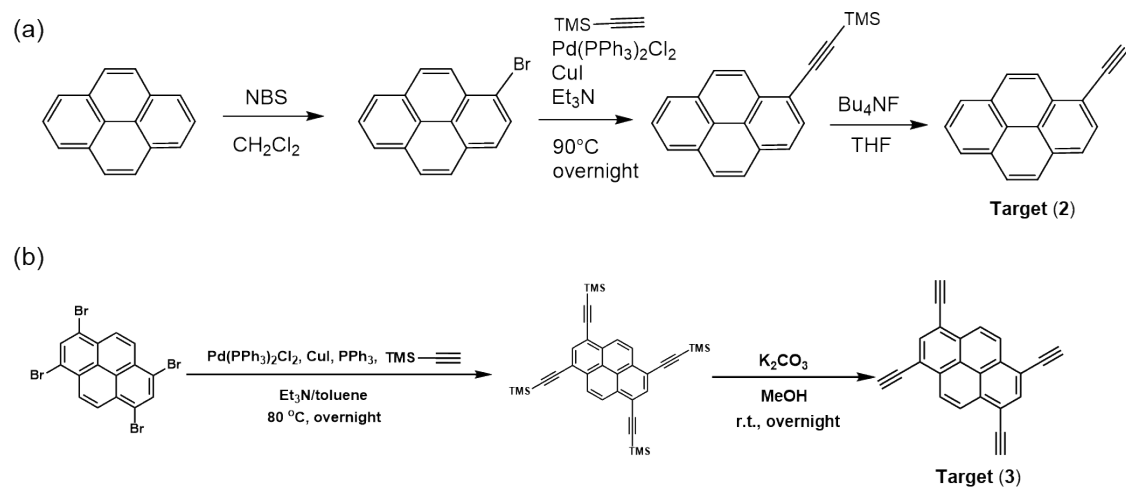

**Scheme S1** Synthetic procedure of (a) 1-ethynylpyrene (**2**) and (b) 1,3,6,8-tetraethynylpyrene (**3**).

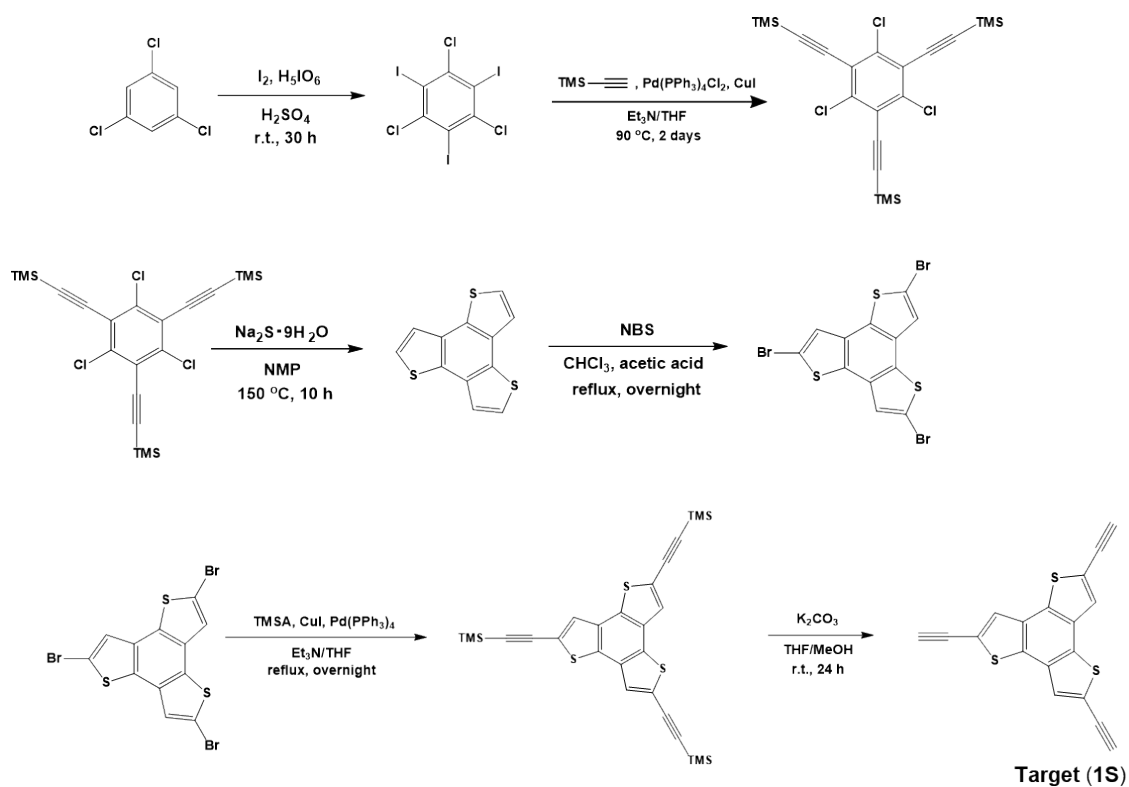

**Scheme S2** Synthetic procedure of 2,5,8-tri(triethynyl)benzo[1,2-*b*:3,4-*b'*:5,6-*b''*]trithiophene (1S).

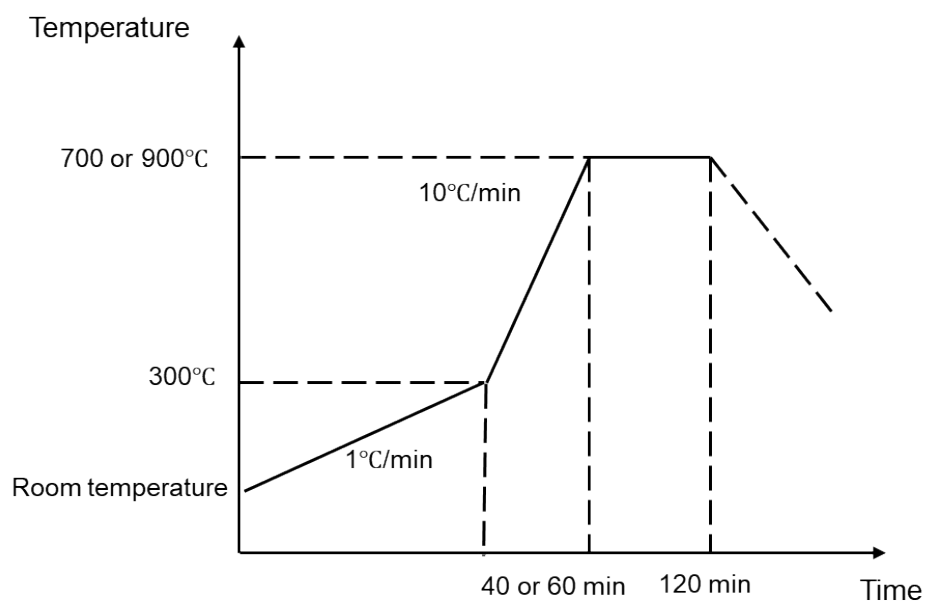

**Scheme S3** Temperature profile for heat treatment.

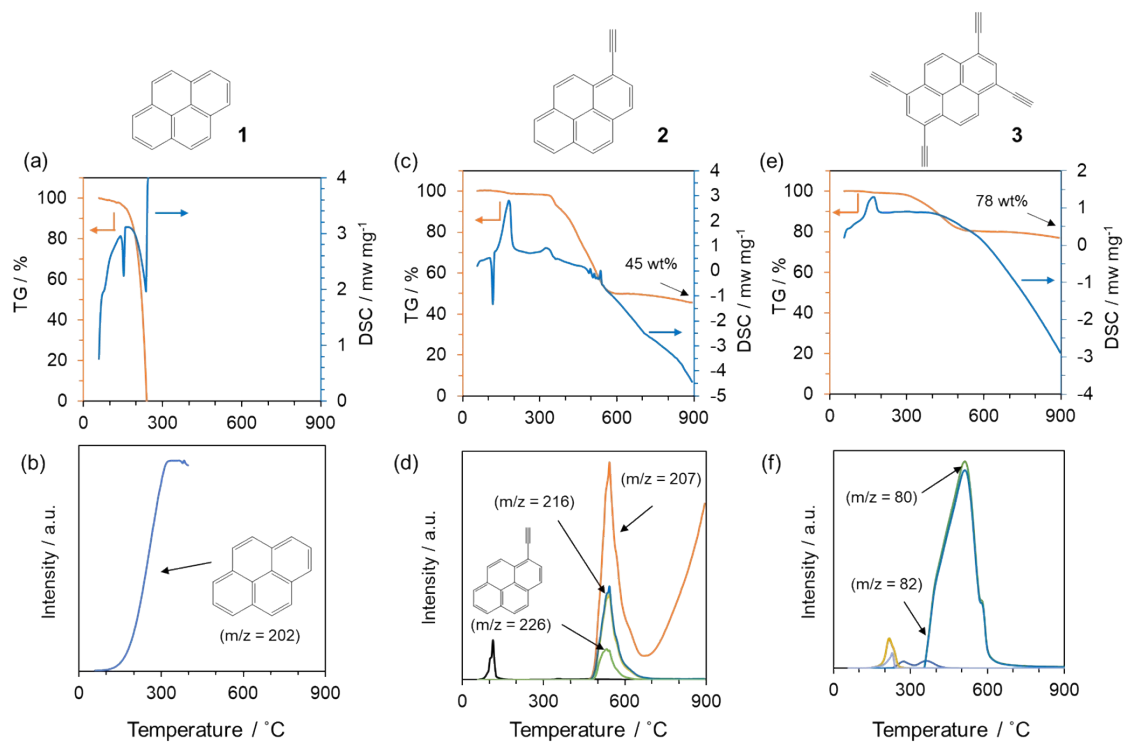

**Fig. S1** TG-DSC profiles and the corresponding MS spectra of (a,b) **1**, (c,d) **2**, and (e,f) **3**.

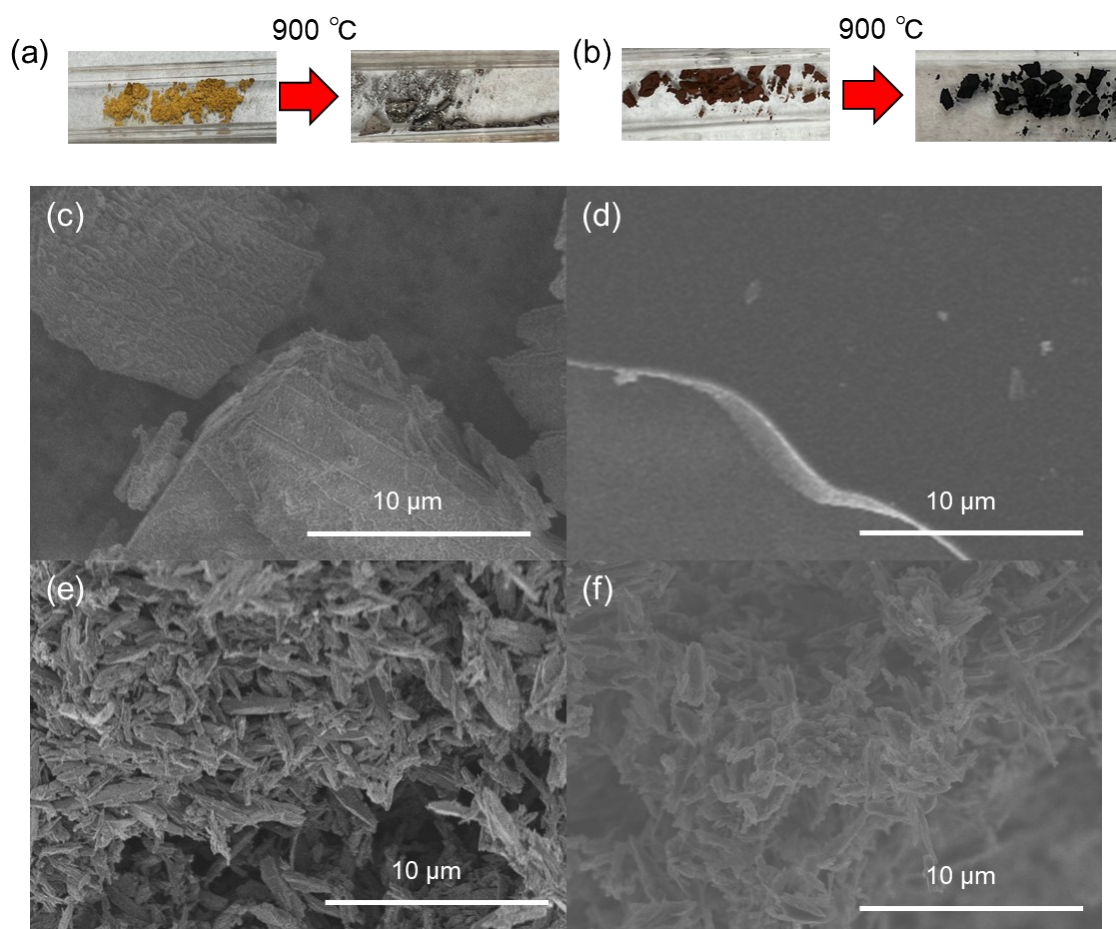

**Fig. S2** Photos of (a) **2** and (b) **3** before and after heat treatment process at 900°C. SEM images of (c) **2**, (d) **2**<sub>900</sub>, (e) **3**, and (f) **3**<sub>900</sub>.

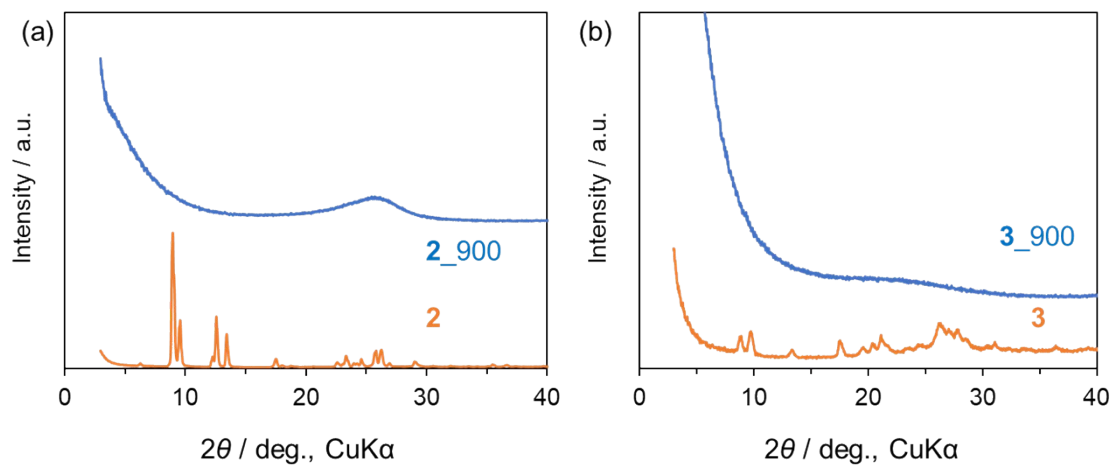

**Fig. S3** XRD patterns of (a) **2** and **2\_900**, and (b) **3** and **3\_900**.

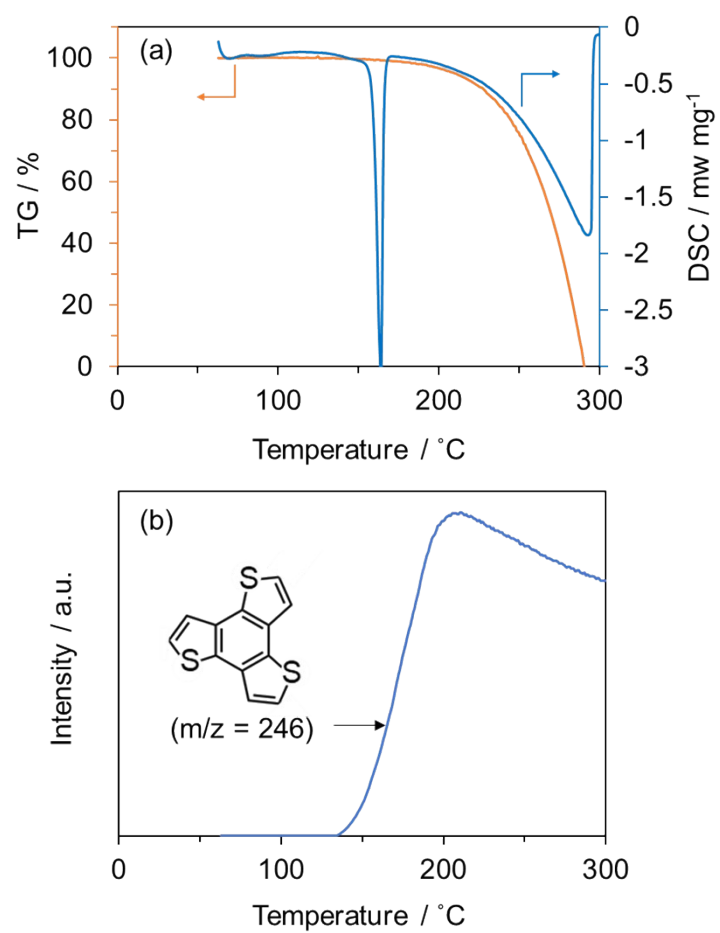

**Fig. S4** (a) TG-DSC profiles and (b) the corresponding MS spectra of **2S**.



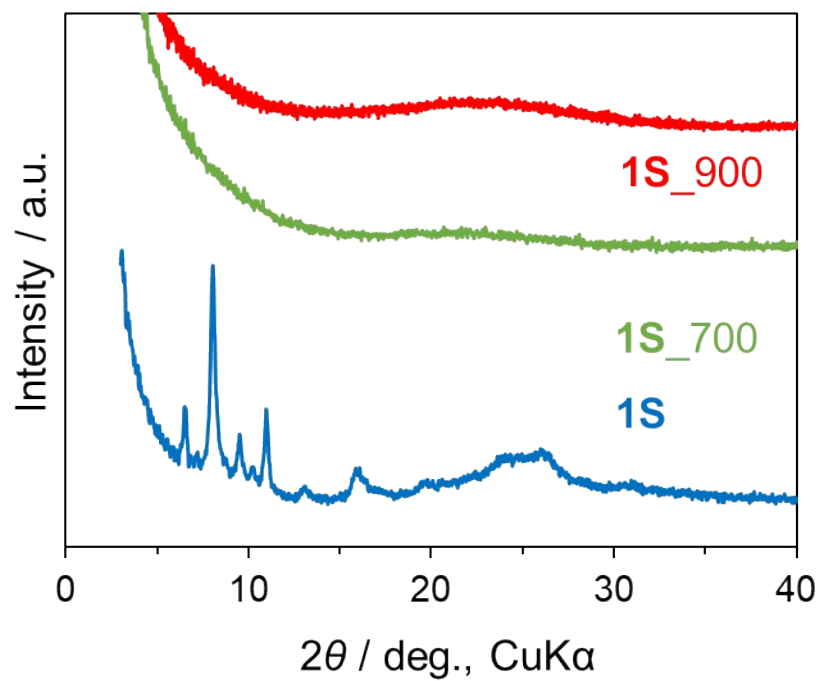

**Fig. S5** PXRD patterns of of **1S**, **1S\_700**, and **1S\_900** samples.

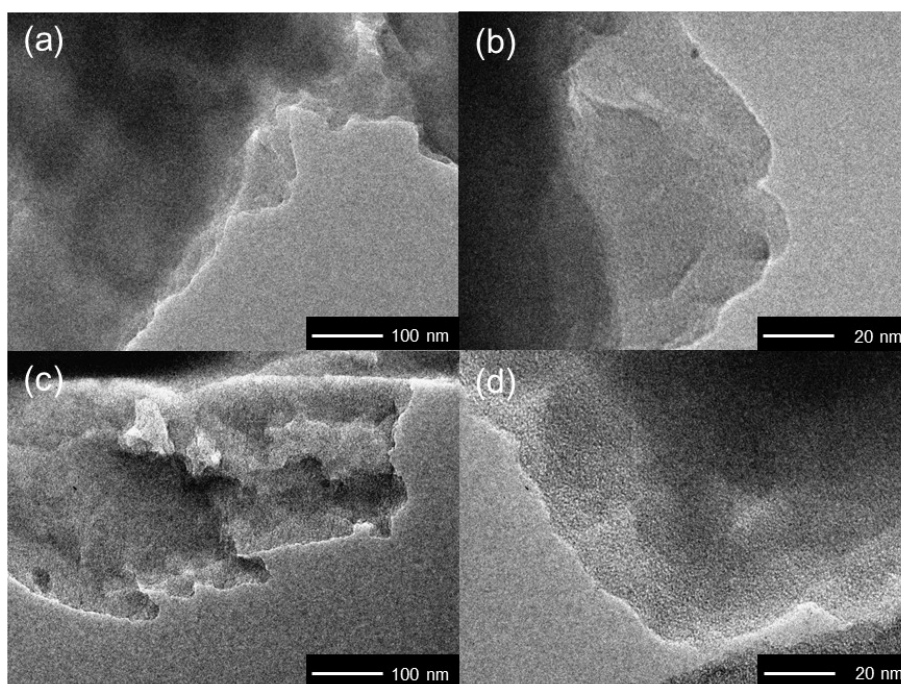

**Fig. S6** TEM images of (a, b) **1S\_700** and (c, d) **1S\_900**.

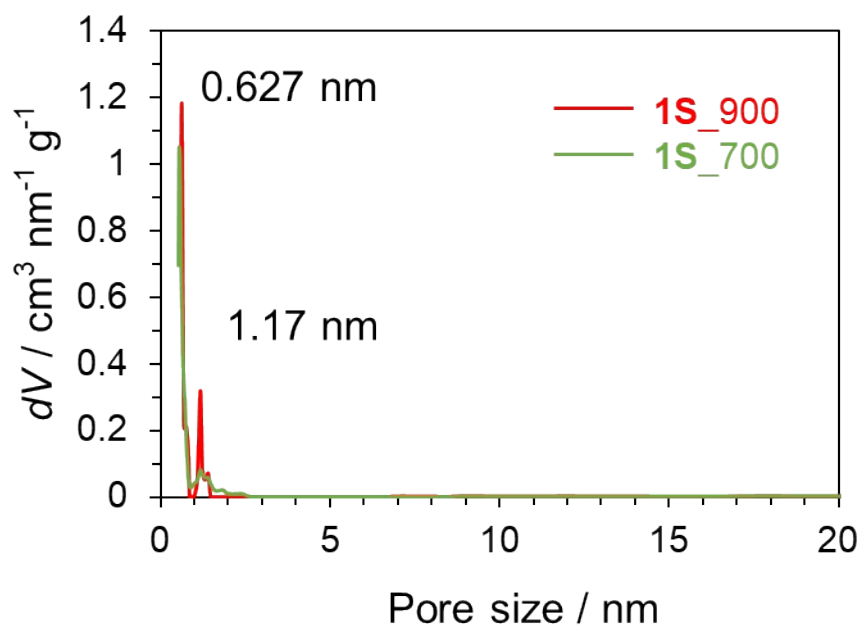

**Fig. S7** Pore-size distributions of **1S\_700** and **1S\_900** calculated from the NLDFT method.

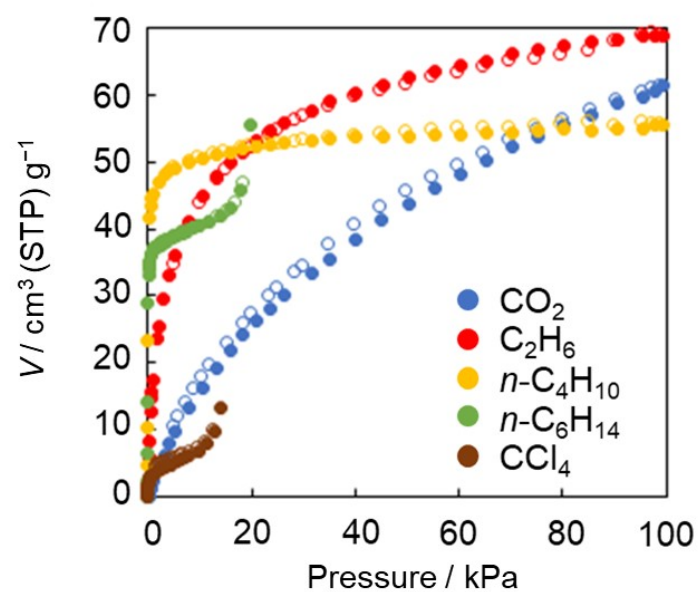

**Fig. S8**  $\text{CO}_2$  (25 °C, blue circle) ethane (25 °C, red circle),  $n$ -butane (25 °C, yellow circle),  $n$ -hexane (25 °C, green circle) and tetrachloromethane (25 °C, brown circle) adsorption/desorption isotherms of **1S\_900**.

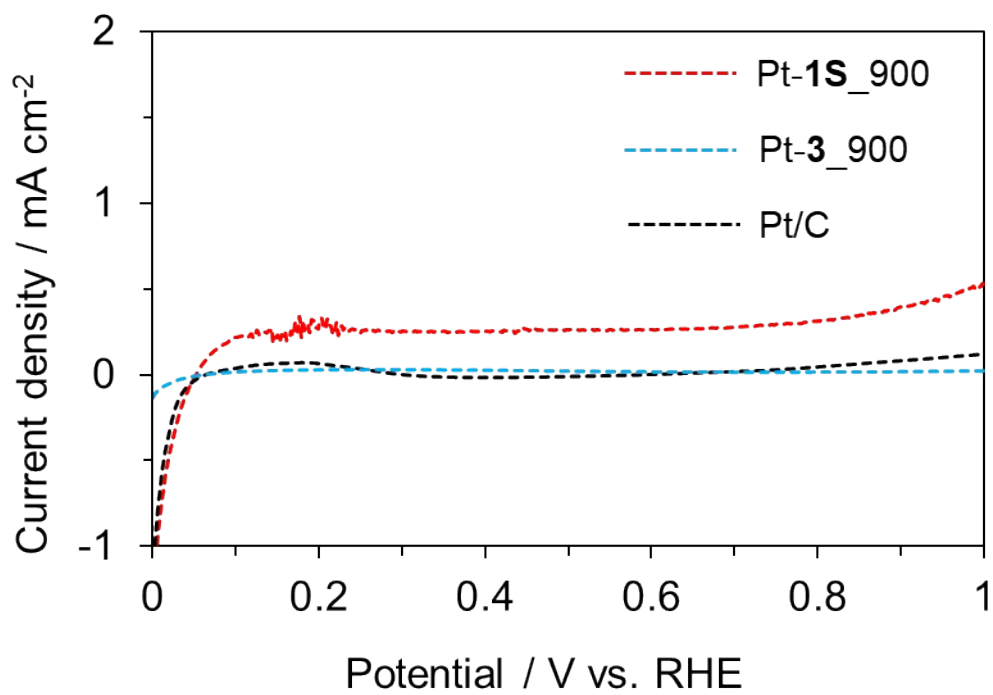

**Fig. S9** Polarization curves of Pt-1S\_900, Pt-3\_900, and Pt/C under Ar flow.

**Table S1**  $I_D/I_G$  ratio of carbonized **2**, **3** and **1S** samples.

| <b>Samples</b> | <b><math>I_D/I_G</math></b> |
|----------------|-----------------------------|
| <b>2_900</b>   | 0.92                        |
| <b>3_900</b>   | 1.0                         |
| <b>1S_700</b>  | 0.84                        |
| <b>1S_900</b>  | 0.98                        |

**Table S2** Elemental analysis results of carbonized **1S** samples.

| <b>Sample</b> | <b>C / wt %</b> | <b>S / wt %</b> |
|---------------|-----------------|-----------------|
| <b>1S_700</b> | 71.1            | 19.9            |
| <b>1S_900</b> | 84.4            | 15.6            |

**Table S3** Porous textures of carbonized **1S**, **2** and **3** samples.

| sample        | $S_{\text{BET}} / \text{m}^2 \text{g}^{-1}$ | $V_{\text{total}}^{\text{a}} / \text{cm}^3 \text{g}^{-1}$ |
|---------------|---------------------------------------------|-----------------------------------------------------------|
| <b>1S</b>     | 25                                          | 0.06                                                      |
| <b>1S_700</b> | 714                                         | 0.31                                                      |
| <b>1S_900</b> | 795                                         | 0.35                                                      |
| <b>2</b>      | 1                                           | $4.7 \times 10^{-3}$                                      |
| <b>2_900</b>  | 0                                           | $1.3 \times 10^{-5}$                                      |
| <b>3</b>      | 24                                          | 0.07                                                      |
| <b>3_900</b>  | 630                                         | 0.33                                                      |

<sup>a</sup> The total pore volume was calculated at  $P/P_0 = 0.96$ .



**Table S4** S contents and  $S_{\text{BET}}$  values of S-doped porous carbons reported in this work and previous works.

| Entry | Temp. / °C | S content / wt% | $S_{\text{BET}} / \text{m}^2 \text{g}^{-1}$ | Ref.      |
|-------|------------|-----------------|---------------------------------------------|-----------|
| 1     | 700        | 19.9            | 714                                         | This work |
| 2     | 900        | 15.6            | 796                                         | This work |
| 3     | 700        | 12.7            | 47                                          | 63        |
| 4     | 700        | 20.1            | 420                                         | 60        |
| 5     | 700        | 10.2            | 308                                         | 61        |
| 6     | 700        | 15.2            | 40                                          | 59        |
| 7     | 900        | 5.6             | 161                                         | 27        |
| 8     | 900        | 9.8             | 668                                         | 28        |
| 9     | 900        | 6.0             | 1189                                        | 62        |
| 10    | 900        | 2.9             | 1054                                        | 64        |
| 11    | 900        | 5.5             | 341                                         | 65        |
| 12    | 900        | 4.7             | 641                                         | 66        |
| 13    | 900        | 5.5             | 1292                                        | 67        |

**Table S5** Pt content determined from Pt 4f XPS analysis for each catalyst before and after the LSV measurement.

| Sample    | Pt content / wt % |       |
|-----------|-------------------|-------|
|           | before            | after |
| Pt-1S_900 | 0.68              | 0.75  |
| Pt-3_900  | 0.12              | -     |
| Pt/C      | 8.60              | 8.52  |
